# Supplementary material for: The gut microbiota-bile acid axis links the positive association between chronic insomnia and cardiometabolic diseases
Source: PubMed Central journal article supplement (PMC9151781; doi:10.1038/s41467-022-30712-x), 2022-05-30
Supplement: 41467_2022_30712_MOESM1_ESM.pdf [file 41467_2022_30712_MOESM1_ESM.pdf]

---

## Supplementary Information

1  
2  
3 **“The gut microbiota-bile acid axis links the positive association between chronic**  
4 **insomnia and cardiometabolic diseases”**

5  
6 **This supplementary file contains the following:**

7 **Supplementary Methods:**

8 **Method S1** Fecal microbial DNA extraction and 16S rRNA gene sequencing in the  
9 Guangzhou Nutrition and Health Study

10 **Method S2** 16S rRNA gene sequencing bioinformatics in the Guangzhou Nutrition  
11 and Health Study

12 **Method S3** Targeted fecal bile acid profiling in the Guangzhou Nutrition and Health  
13 Study

14 **Supplementary Tables:**

15 **Supplementary Table 1** Gut microbiota features of chronic insomnia with three  
16 different models

17 **Supplementary Table 2** The stratification analysis of the chronic insomnia-gut  
18 microbiota association by age or sex

19 **Supplementary Table 3** The association of chronic insomnia symptom score with  
20 *Ruminococcaceae* UCG-002 and *Ruminococcaceae* UCG-003 in the Guangdong Gut  
21 Microbiome Project

22 **Supplementary Table 4** Sensitivity analysis for the association of chronic insomnia  
23 with bile acids by adding dietary cholesterol intake and fiber intake as additional  
24 covariates

25 **Supplementary Table 5** The association of chronic insomnia with short-chain fatty  
26 acids, aromatic amino acids and their derivatives

27 **Supplementary Table 6** The stratification analysis of the gut microbiota-CMD  
28 association by age or sex

---

29 **Supplementary Table 7** Sensitivity analysis of the mediation effect of bile acids in  
30 the association of chronic insomnia-related gut microbiota with CMD risk.

31 **Supplementary Table 8** The association of tea consumption with chronic insomnia

32

33

34 **Supplementary Figures:**

35 **Supplementary Fig. 1** The association of chronic insomnia with Shannon index,

36 **Chao 1 index, ACE index and Simpson index among four groups.** n = 1,809. **a.**

37 Shannon index for chronic insomnia. **b.** Chao 1 index for chronic insomnia. **c.** ACE

38 index for chronic insomnia. **d.** Simpson index for chronic insomnia. Multivariable

39 linear regression was used to estimate the difference in Shannon index, Chao 1 index,

40 ACE index and Simpson index among four groups with three different statistical

41 models (Methods). Box plots indicate median and interquartile range (IQR). The

42 upper and lower whiskers indicate 1.5 times the IQR from above the upper quartile

43 and below the lower quartile. Value with symbol is significantly different (model 1:

44 \* $p < 0.05$ , \*\* $p < 0.01$ , \*\*\* $p < 0.001$ ; model 2: + $p < 0.05$ , ++ $p < 0.01$ , +++ $p < 0.001$ ;

45 model 3: # $p < 0.05$ , ## $p < 0.01$ , ### $p < 0.001$ ). All statistical tests were two-sided.

46 Source data are provided as a Source Data file.

47

48 **Supplementary Fig. 2** The association of chronic insomnia with Shannon index,

49 **Chao 1 index, ACE index and Simpson index in the discovery cohort comparing**

50 **Chronic insomnia group and Long-term healthy group.** n = 1,809. **a.** Shannon

51 index for chronic insomnia. **b.** Chao 1 index for chronic insomnia. **c.** ACE index for

52 chronic insomnia. **d.** Simpson index for chronic insomnia. Multivariable linear

53 regression was used to estimate the difference in Shannon index, Chao 1 index, ACE

54 index and Simpson index comparing chronic insomnia group and Long-term healthy

55 group using three different statistical models (Methods). Box plots indicate median

56 and interquartile range (IQR). The upper and lower whiskers indicate 1.5 times the

57 IQR from above the upper quartile and below the lower quartile. Value with symbol is

58 significantly different (model 1: \* $p < 0.05$ , \*\* $p < 0.01$ , \*\*\* $p < 0.001$ ; model 2: + $p <$

---

59 0.05,  $^{++}p < 0.01$ ,  $^{+++}p < 0.001$ ; model 3:  $^{\#}p < 0.05$ ,  $^{\#\#}p < 0.01$ ,  $^{\#\#\#}p < 0.001$ ). All  
60 statistical tests were two-sided. Source data are provided as a Source Data file.

61

62 **Supplementary Fig. 3 The association of chronic insomnia with Shannon index,**  
63 **Chao 1 index, ACE index and Simpson index in the validation cohort comparing**  
64 **Chronic insomnia group and Non-chronic insomnia group.** n = 6,122. **a.** Shannon  
65 index for chronic insomnia. **b.** Chao 1 index for chronic insomnia. **c.** ACE index for  
66 chronic insomnia. **d.** Simpson index for chronic insomnia. Multivariable linear  
67 regression was used to estimate the difference in Shannon index, Chao 1 index, ACE  
68 index and Simpson index comparing Chronic insomnia group and Non-chronic  
69 insomnia group, adjusted for age, sex, BMI, smoking status, alcohol status, education,  
70 dietary intake of vegetables, fruits, and red and processed meat. Box plots indicate  
71 median and interquartile range (IQR). The upper and lower whiskers indicate 1.5  
72 times the IQR from above the upper quartile and below the lower quartile. Value with  
73 asterisk is significantly different ( $^*p < 0.05$ ,  $^{**}p < 0.01$ ,  $^{***}p < 0.001$ ). All statistical  
74 tests were two-sided. Source data are provided as a Source Data file.

75

76 **Supplementary Fig. 4 Sensitivity analysis for the association between chronic**  
77 **insomnia and gut microbial features in the Guangdong Gut Microbiome Project.**  
78 For the Guangdong Gut Microbiome Project (GGMP), we did not include income in  
79 the statistical models due to large amount of missing values (income data were  
80 available among 3774 out of 6122 participants). A sensitivity analysis using  
81 multivariable linear regression ( $\beta$  coefficient) with further adjustment for income was  
82 used to examine the robustness of the associations between chronic insomnia and gut  
83 microbial features. Values presented are beta coefficients (95% confidence intervals).  
84 Value with asterisk is significantly different ( $^*p < 0.05$ ,  $^{**}p < 0.01$ ,  $^{***}p < 0.001$ ).  
85 Error bars are beta coefficient with 95% confidence intervals. The  
86 Benjamini-Hochberg method was used to control false discovery rate (FDR) due to  
87 multiple testing. All statistical tests were two-sided. Source data are provided as a  
88 Source Data file.

89

**Supplementary Fig. 5 The potential bile acid features of chronic insomnia.**

Orthogonal partial least squares discrimination analysis (OPLS-DA) was used to identify potential bile acids associated with chronic insomnia comparing Chronic insomnia group with Long-term healthy group. The x axis shows the variable important in projection (VIP) values and the y axis indicates the partial correlation coefficient values. Points are coloured based on the significance of the obtained associations (green indicates positive associations with  $VIP > 1$  and  $|p(\text{corr})| > 0.3$ , pink indicates negative associations with  $VIP > 1$  and  $|p(\text{corr})| > 0.3$ ). All statistical tests were two-sided. Source data are provided as a Source Data file.

99

**Supplementary Fig. 6 Sensitivity analysis for the association between chronic****insomnia-related microbial features and cardiometabolic diseases in the**

**Guangdong Gut Microbiome Project.** In the Guangdong Gut Microbiome Project (GGMP), income data were available among 3774 out of 6122 participants. A sensitivity analysis using Multivariable logistic regression (odds ratio) with further adjustment for income was used to estimate the association of the chronic insomnia inverse-related microbial features *Ruminococcaceae UCG-002* and *Ruminococcaceae UCG-003* with different cardiometabolic diseases (CMD) in the discovery and validation cohorts, respectively (Methods). The effect estimates from the discovery and validation cohorts were pooled using random effects meta-analysis for each of the above analyses. Values presented are odds ratio (95% confidence intervals) with corresponding  $p$ -values. Value with asterisk is significantly different ( $*p < 0.05$ ,  $**p < 0.01$ ,  $***p < 0.001$ ). The Benjamini-Hochberg method was used to control FDR due to multiple testing. All statistical tests were two-sided. Source data are provided as a Source Data file.

115

**Supplementary Fig. 7 Prospective association of dietary factors with the****identified microbial feature *Ruminococcaceae UCG-003* linking chronic insomnia**

**and cardiometabolic diseases.** Prospective association of dietary factors with the

---

119 identified microbial feature *Ruminococcaceae UCG-003* linking chronic insomnia and  
120 cardiometabolic diseases (CMD) in the GMHS. Multivariable linear regression was  
121 used to determine the prospective association of dietary factors with  
122 *Ruminococcaceae UCG-003*, adjusting for age, sex, BMI, smoking status, alcohol  
123 status, physical activity, education, income, dietary intake of vegetables/fruits/red and  
124 processed meat/fish/dairy products/coffee/tea) (mutual adjustment for each other) and  
125 total energy intake. The analyses were conducted among the GNHS participants  
126 without chronic insomnia or CMD at baseline. Values presented are beta coefficients  
127 (95% confidence intervals) with corresponding  $p$ -values. Value with asterisk is  
128 significantly different ( $*p < 0.05$ ,  $**p < 0.01$ ,  $***p < 0.001$ ). The  
129 Benjamini-Hochberg method was used to control FDR due to multiple testing. All  
130 statistical tests were two-sided. Source data are provided as a Source Data file.

---

## 131 Supplemental Methods

### 132 Method S1 Fecal microbial DNA extraction and 16S rRNA gene sequencing in 133 the Guangzhou Nutrition and Health Study

134 Fecal microbial DNA was extracted from each sample using the QIAamp® DNA  
135 Stool Mini Kit (Qiagen, Hilden, Germany) following the manufacturer's instruction.  
136 DNA concentration and purity were monitored on 1% agarose gels. According to the  
137 concentration, DNA was diluted to 1 ng/μL using sterile water. The 16S rRNA gene  
138 amplification procedure was divided into two PCR steps, in the first PCR reaction, the  
139 V3-V4 hypervariable region of the 16S rRNA gene was amplified from genomic DNA  
140 using primers 341F(CCTACGGGNGGCWGCAG) and 805R(GACTACHVGGGTAT  
141 CTAATCC). Amplification was performed in 96-well microtiter plates with a reaction  
142 mixture consisting of 1X KAPA HiFi Hot start Ready Mix, 0.1 μM primer 341 F,  
143 0.1 μM primer 805 R, and 12.5 ng template DNA, giving a total volume of 50 μL per  
144 sample. Reactions were run in a T100 PCR thermocycle (BIO-RAD) according to the  
145 following cycling program: 3 min of denaturation at 94 °C, followed by 18 cycles of  
146 30 s at 94 °C (denaturing), 30 s at 55 °C (annealing), and 30 s at 72 °C (elongation),  
147 with a final extension at 72 °C for 5 min. Subsequently, the amplified products were  
148 checked by 2% agarose gel electrophoresis and ethidium bromide staining. Amplicons  
149 were quantified using the Qubit quantification system (Thermo Scientific, Wilmington,  
150 DE, US) following the manufacturers' instructions. Sequencing primers and adaptors  
151 were added to the amplicon products in the second PCR step as follows 2 μL of the  
152 diluted amplicons were mixed with a reaction solution consisting of 1×KAPA HiFi  
153 Hotstart ReadyMix, 0.5 μM fusion forward and 0.5 μM fusion reverse primer, 30 ng  
154 Meta-gDNA(total volume 50 μL). The PCR was run according to the cycling program  
155 above except with cycling number of 12. The amplification products were purified  
156 with Agencourt AMPure XP Beads (Beckman Coulter Genomics, MA, USA)  
157 according to the manufacturer's instructions and quantified as described above.  
158 Equimolar amounts of the amplification products were pooled together in a single  
159 tube. The concentration of the pooled libraries was determined by the Qubit  
160 quantification system. Amplicon sequencing was performed on the Illumina MiSeq

---

161 System (Illumina Inc., CA, USA). The MiSeq Reagent Kits v2 (Illumina Inc.) was  
162 used. Automated cluster generation and  $2 \times 250$  bp paired-end sequencing with  
163 dual-index reads were performed.

164

165 **Method S2 16S rRNA gene sequencing bioinformatics in the Guangzhou**  
166 **Nutrition and Health Study**

167 Fastq-files were demultiplexed by the MiSeq Controller Software (Bcl2fastq version  
168 2.20, Illumina Inc.). The sequences were trimmed for amplification primers, diversity  
169 spacers, and sequencing adapters, merge-paired and quality filtered by Quantitative  
170 Insights into Microbial Ecology (QIIME) software version 2-2020.2. DADA2 was  
171 used for amplicon sequence variants (ASVs) clustering equaling 100%<sup>1</sup>. A  
172 representative sequence was picked for each ASV and the Sliva reference database  
173 version 138 was used to annotate taxonomic information.  $\alpha$ -diversity (Observed  
174 species, Shannon index, Chao1 index) and  $\beta$ -diversity (Bray-Curtis distance)  
175 measures were calculated based on the genus-level counts. The genus-level absolute  
176 abundance table was extracted from the pipeline and converted to relative abundances  
177 by normalizing for analyzing the composition of gut microbiota by QIIME2.

178

179 Principal coordinate analysis (PCoA) based on genus-level Bray-Curtis distance and  
180 permutational multivariate analysis of variance (PERMANOVA) were performed to  
181 compare the dissimilarity of global microbiota composition. MaAsLin is a  
182 multivariate statistical framework that identifies associations between continuous and  
183 discrete clinical metadata and microbial community abundances. Microbiome-based  
184 biomarker discovery was performed with MaAsLin using the online galaxy server  
185 (<https://huttenhower.sph.harvard.edu/galaxy/>). Briefly, the percentage of each genus  
186 was arcsin-square-root-transformed. For each correlation between metadata (as  
187 predictors) and transformed genus abundances (as response variables), we adjusted  
188 potential confounders using the three different statistical models ( $q$  value (false  
189 discovery rate adjusted  $p$  value)  $\leq 0.25$  was considered statistically significant).  
190 Model 1 was adjusted for age, sex, BMI, smoking status, alcohol status, physical

---

191 activity, education, income and total energy intake at baseline. Model 2 was further  
192 adjusted for hypertension, hyperlipidaemia, metabolic syndrome (MetS), type 2  
193 diabetes (T2D), coronary heart disease (CHD), stroke and medication for T2D. Model  
194 3 was further adjusted for vegetables, fruits, red and processed meat, fish, dairy  
195 products, coffee and tea. To further reduce the computational load, the genera that  
196 were present in < 10% of the population were excluded. The Benjamini-Hochberg  
197 method was used to adjust *p* values for multiple hypotheses.

198

### 199 **Method S3 Targeted fecal bile acid profiling in the Guangzhou Nutrition and** 200 **Health Study**

201 Targeted bile acid profiling of fecal samples (n=954) was performed by  
202 Metabo-Profile (Shanghai, China). The order of all test samples is randomly selected  
203 before the preparation. 10 mg lyophilized feces were homogenized with 25 $\mu$ L water  
204 and extracted with 185 $\mu$ L cold ACN-Methanol (8/2, v/v). After centrifugation, 30  $\mu$ L  
205 supernatant was used to derivatization with 20  $\mu$ L freshly prepared derivative reagents  
206 on a Biomek 4000 workstation (Biomek 4000, Beckman Coulter, Inc., Brea,  
207 California, USA), followed by mixing with internal standards. Subsequently, the  
208 derivatized samples and serial dilutions of derivatized stock standards were randomly  
209 analyzed and quantitated by an ultra-performance liquid chromatography coupled to  
210 tandem mass spectrometry (UPLC-MS/MS) system (ACQUITY UPLC-Xevo TQ-S,  
211 Waters Corp., Milford, MA, USA). 41 of bile acid standard substances were obtained  
212 from Sigma-Aldrich (St. Louis, MO, USA), Steraloids Inc. (Newport, RI, USA) and  
213 TRC Chemicals (Toronto, ON, Canada). Three types of quality control samples i.e.,  
214 test mixtures, internal standards, and pooled biological samples are routinely used in  
215 metabolomics platform. The derivatized pooled quality control samples were injected  
216 every 14 test samples. Raw data generated by UPLC-MS/MS were processed using  
217 the QuanMET software (v2.0, Metabo-Profile, Shanghai, China) to perform peak  
218 integration, calibration, and quantification for each bile acid.

219



220 **Supplementary Tables**221 **Supplementary Table 1** Gut microbiota features of chronic insomnia with three

## 222 different models\*

| Genus                          | Coefficient | Correlation direction | <i>q</i> value | Phylum     | Family          |
|--------------------------------|-------------|-----------------------|----------------|------------|-----------------|
| Model 1                        |             |                       |                |            |                 |
| <i>Ruminococcaceae UCG-002</i> | -0.077      | Negative              | 0.112          | Firmicutes | Ruminococcaceae |
| <i>Ruminococcaceae UCG-003</i> | -0.050      | Negative              | 0.112          | Firmicutes | Ruminococcaceae |
| Model 2                        |             |                       |                |            |                 |
| <i>Ruminococcaceae UCG-002</i> | -0.077      | Negative              | 0.140          | Firmicutes | Ruminococcaceae |
| <i>Ruminococcaceae UCG-003</i> | -0.052      | Negative              | 0.130          | Firmicutes | Ruminococcaceae |
| Model 3                        |             |                       |                |            |                 |
| <i>Ruminococcaceae UCG-002</i> | -0.073      | Negative              | 0.191          | Firmicutes | Ruminococcaceae |
| <i>Ruminococcaceae UCG-003</i> | -0.049      | Negative              | 0.223          | Firmicutes | Ruminococcaceae |

223 \*The gut microbiota biomarkers were determined by MaAsLin adjusted by three different models.

224 Model 1 was adjusted for age, sex, BMI, smoking status, alcohol status, physical activity, education,

225 income and total energy intake at baseline. Model 2 was further adjusted for hypertension,

226 hyperlipidaemia, metabolic syndrome (MetS), type 2 diabetes (T2D), coronary heart disease (CHD),

227 stroke and medication for T2D. Model 3 was further adjusted for vegetables, fruits, red and processed

228 meat, fish, dairy products, coffee and tea. *q* value < 0.25 was considered statistically significant.

229 **Supplementary Table 2** The stratification analysis of the chronic insomnia-gut  
 230 microbiota association by age or sex\*

| Cohorts                        | Beta coefficient | 95%CI          | <i>p</i> value | <i>p</i> <sub>interaction</sub> value |
|--------------------------------|------------------|----------------|----------------|---------------------------------------|
| Age stratification             |                  |                |                |                                       |
| <i>Ruminococcaceae</i> UCG-002 |                  |                |                | 0.447                                 |
| High age group                 |                  |                |                |                                       |
| Discovery cohort (n = 856)     | -0.25            | [-0.44, -0.05] | 0.012          |                                       |
| Validation cohort (n = 3024)   | -0.10            | [-0.17, -0.03] | 0.008          |                                       |
| Meta-analysis (n = 3880)       | -0.15            | [-0.28, -0.01] | 0.032          |                                       |
| Low age group                  |                  |                |                |                                       |
| Discovery cohort (n = 863)     | -0.14            | [-0.31, 0.04]  | 0.120          |                                       |
| Validation cohort (n = 3098)   | -0.07            | [-0.14, -0.01] | 0.047          |                                       |
| Meta-analysis (n = 3961)       | -0.08            | [-0.15, -0.02] | 0.015          |                                       |
| <i>Ruminococcaceae</i> UCG-003 |                  |                |                | 0.562                                 |
| High age group                 |                  |                |                |                                       |
| Discovery cohort (n = 856)     | -0.19            | [-0.35, -0.04] | 0.017          |                                       |
| Validation cohort (n = 3024)   | -0.10            | [-0.17, -0.04] | 0.008          |                                       |
| Meta-analysis (n = 3880)       | -0.12            | [-0.19, -0.05] | 0.001          |                                       |
| Low age group                  |                  |                |                |                                       |
| Discovery cohort (n = 863)     | -0.12            | [-0.26, 0.02]  | 0.092          |                                       |
| Validation cohort (n = 3098)   | -0.06            | [-0.14, 0.01]  | 0.078          |                                       |
| Meta-analysis (n = 3961)       | -0.08            | [-0.14, -0.01] | 0.019          |                                       |
| Sex stratification             |                  |                |                |                                       |
| <i>Ruminococcaceae</i> UCG-002 |                  |                |                | 0.127                                 |
| men                            |                  |                |                |                                       |
| Discovery cohort (n = 571)     | -0.21            | [-0.50, 0.08]  | 0.155          |                                       |
| Validation cohort (n = 2723)   | -0.07            | [-0.15, 0.01]  | 0.063          |                                       |

---

|                                |       |                |        |       |
|--------------------------------|-------|----------------|--------|-------|
| Meta-analysis (n = 3294)       | -0.08 | [-0.16, -0.01] | 0.031  |       |
| women                          |       |                |        |       |
| Discovery cohort (n = 1148)    | -0.19 | [-0.33, -0.04] | 0.013  |       |
| Validation cohort (n = 3399)   | -0.11 | [-0.17, -0.04] | 0.003  |       |
| Meta-analysis (n = 4547)       | -0.12 | [-0.18, -0.06] | <0.001 |       |
| <i>Ruminococcaceae UCG-003</i> |       |                |        | 0.904 |
| men                            |       |                |        |       |
| Discovery cohort (n = 571)     | -0.23 | [-0.46, -0.01] | 0.040  |       |
| Validation cohort (n = 2723)   | -0.04 | [-0.12, 0.03]  | 0.289  |       |
| Meta-analysis (n = 3294)       | -0.11 | [-0.29, 0.07]  | 0.240  |       |
| women                          |       |                |        |       |
| Discovery cohort (n = 1148)    | -0.14 | [-0.26, -0.02] | 0.024  |       |
| Validation cohort (n = 3399)   | -0.11 | [-0.18, -0.04] | 0.001  |       |
| Meta-analysis (n = 4547)       | -0.12 | [-0.18, -0.06] | <0.001 |       |

---

231 \* Multivariable linear regression (Beta coefficient) was used to estimate the association of chronic  
232 insomnia with *Ruminococcaceae UCG-002* and *Ruminococcaceae UCG-003*. Median of age was used  
233 as the cutoff in the age stratification. All statistical tests were two-sided.

234 **Supplementary Table 3** The association of chronic insomnia symptom score with  
 235 *Ruminococcaceae* UCG-002 and *Ruminococcaceae* UCG-003 in the Guangdong Gut  
 236 Microbiome Project\*

| Species                        | Beta coefficient | 95%CI          | <i>p</i> value |
|--------------------------------|------------------|----------------|----------------|
| <i>Ruminococcaceae</i> UCG-002 | -0.04            | [-0.06, -0.02] | <0.001         |
| <i>Ruminococcaceae</i> UCG-003 | -0.04            | [-0.07, -0.01] | 0.002          |

237 \*Multivariable linear regression (Beta coefficient) was used to estimate the association of chronic  
 238 insomnia symptom score with the gut microbial biomarkers of chronic insomnia, adjusted for the same  
 239 covariates. All statistical tests were two-sided.

240 **Supplementary Table 4** Sensitivity analysis for the association of chronic insomnia  
 241 with bile acids by adding dietary cholesterol intake and fiber intake as additional  
 242 covariates\*

| Bile acids           | Beta coefficient | 95%CI          | <i>p</i> value |
|----------------------|------------------|----------------|----------------|
| Muro cholic acid     | 0.21             | [0.04, 0.38]   | 0.049          |
| Nor cholic acid      | 0.21             | [0.04, 0.37]   | 0.042          |
| Isolithocholic acid  | -0.26            | [-0.43, -0.09] | 0.030          |
| Lithocholic acid     | -0.21            | [-0.38, -0.04] | 0.035          |
| Ursodeoxycholic acid | -0.22            | [-0.39, -0.05] | 0.049          |

243 \*Multivariable linear regression (Beta coefficient) was used to estimate the association of chronic  
 244 insomnia with bile acids, adjusted for dietary cholesterol intake and fiber intake as additional covariates  
 245 in the above model 3. The Benjamini-Hochberg method was used to control false discovery rate (FDR)  
 246 for multiple testing. All statistical tests were two-sided.

247 **Supplementary Table 5** The association of chronic insomnia with short-chain fatty  
 248 acids, aromatic amino acids and their derivatives\*

| Microbial metabolites                      | Beta coefficient | 95%CI         | <i>p</i> value |
|--------------------------------------------|------------------|---------------|----------------|
| Short chain fatty acids                    |                  |               |                |
| Acetic acid                                | 0.01             | [-0.03, 0.04] | 0.899          |
| Propionic acid                             | 0.01             | [-0.04, 0.05] | 0.978          |
| Butyric acid                               | -0.01            | [-0.05, 0.04] | 0.909          |
| Isobutyric acid                            | -0.03            | [-0.09, 0.02] | 0.079          |
| Valeric acid                               | -0.04            | [-0.13, 0.04] | 0.649          |
| Isovaleric acid                            | -0.03            | [-0.10, 0.04] | 0.595          |
| Isocaproic acid                            | -0.06            | [-0.18, 0.06] | 0.787          |
| Caproic acid                               | -0.12            | [-0.25, 0.01] | 0.547          |
| Aromatic amino acids and their derivatives |                  |               |                |
| L-tyrosine                                 | 0.01             | [-0.04, 0.05] | 0.799          |
| 4-hydroxyphenylpyruvic acid                | -0.01            | [-0.07, 0.05] | 0.816          |
| 4-hydroxyphenylacetic acid                 | 0.05             | [-0.04, 0.15] | 0.549          |
| 4-hydroxyphenyllactic acid                 | -0.01            | [-0.10, 0.10] | 0.965          |
| 4-hydroxybenzoic acid                      | 0.07             | [-0.02, 0.16] | 0.534          |
| Hippuric acid                              | 0.14             | [-0.04, 0.32] | 0.502          |
| Ortho-hydroxyphenylacetic acid             | -0.04            | [-0.14, 0.05] | 0.662          |
| L-phenylalanine                            | 0.01             | [-0.04, 0.05] | 0.803          |
| Phenylpyruvic acid                         | -0.05            | [-0.14, 0.04] | 0.761          |
| Phenyllactic acid                          | -0.08            | [-0.16, 0.01] | 0.781          |
| Phenylacetic acid                          | -0.05            | [-0.14, 0.04] | 0.541          |
| 2-phenylpropionate                         | -0.16            | [-0.36, 0.03] | 0.781          |
| L-tryptophan                               | 0.02             | [-0.03, 0.06] | 0.762          |
| 3-indolepropionic acid                     | 0.10             | [-0.27, 0.07] | 0.634          |

---

|                   |       |               |       |
|-------------------|-------|---------------|-------|
| Indoleacetic acid | -0.03 | [-0.12, 0.07] | 0.735 |
|-------------------|-------|---------------|-------|

---

249 \*Multivariable linear regression (Beta coefficient) was used to estimate the association of chronic  
250 insomnia with short-chain fatty acids, aromatic amino acids and their derivatives, adjusted for same  
251 covariates as above model 3. The Benjamini-Hochberg method was used to control false discovery rate  
252 (FDR) for multiple testing. All statistical tests were two-sided.

253 **Supplementary Table 6** The stratification analysis of the gut microbiota-CMD  
 254 association by age or sex\*

| Cohorts                                      | Odds ratio (OR) | 95%CI        | <i>p</i> value | <i>p</i> <sub>interaction</sub> value |
|----------------------------------------------|-----------------|--------------|----------------|---------------------------------------|
| Age stratification                           |                 |              |                |                                       |
| <i>Ruminococcaceae</i> UCG-002-Dyslipidaemia |                 |              |                | 0.270                                 |
| High age group                               |                 |              |                |                                       |
| Discovery cohort (n = 856)                   | 0.88            | [0.77, 1.02] | 0.083          |                                       |
| Validation cohort (n = 3024)                 | 0.90            | [0.84, 0.97] | 0.005          |                                       |
| Meta-analysis (n = 3880)                     | 0.90            | [0.84, 0.96] | 0.001          |                                       |
| Low age group                                |                 |              |                |                                       |
| Discovery cohort (n = 863)                   | 0.85            | [0.73, 0.99] | 0.036          |                                       |
| Validation cohort (n = 3098)                 | 0.99            | [0.92, 1.06] | 0.717          |                                       |
| Meta-analysis (n = 3961)                     | 0.93            | [0.73, 1.07] | 0.314          |                                       |
| <i>Ruminococcaceae</i> UCG-002-T2D           |                 |              |                | 0.489                                 |
| High age group                               |                 |              |                |                                       |
| Discovery cohort (n = 856)                   | 0.82            | [0.68, 0.99] | 0.039          |                                       |
| Validation cohort (n = 3024)                 | 0.84            | [0.76, 0.94] | 0.003          |                                       |
| Meta-analysis (n = 3880)                     | 0.84            | [0.76, 0.92] | <0.001         |                                       |
| Low age group                                |                 |              |                |                                       |
| Discovery cohort (n = 863)                   | 0.70            | [0.52, 0.91] | 0.011          |                                       |
| Validation cohort (n = 3098)                 | 1.02            | [0.87, 1.20] | 0.792          |                                       |
| Meta-analysis (n = 3961)                     | 0.86            | [0.59, 1.25] | 0.426          |                                       |
| <i>Ruminococcaceae</i> UCG-002-MetS          |                 |              |                | 0.713                                 |
| High age group                               |                 |              |                |                                       |
| Discovery cohort (n = 856)                   | 0.70            | [0.58, 0.84] | <0.001         |                                       |
| Validation cohort (n = 3024)                 | 0.90            | [0.83, 0.98] | 0.017          |                                       |
| Meta-analysis (n = 3880)                     | 0.81            | [0.63, 1.03] | 0.089          |                                       |



---

|                                              |      |              |        |       |
|----------------------------------------------|------|--------------|--------|-------|
| Low age group                                |      |              |        |       |
| Discovery cohort (n = 863)                   | 0.84 | [0.69, 1.01] | 0.072  |       |
| Validation cohort (n = 3098)                 | 0.85 | [0.77, 0.95] | 0.003  |       |
| Meta-analysis (n = 3961)                     | 0.85 | [0.78, 0.93] | <0.001 |       |
| <i>Ruminococcaceae UCG-003-Dyslipidaemia</i> |      |              |        | 0.511 |
| High age group                               |      |              |        |       |
| Discovery cohort (n = 856)                   | 0.91 | [0.79, 1.04] | 0.173  |       |
| Validation cohort (n = 3024)                 | 0.89 | [0.83, 0.95] | 0.001  |       |
| Meta-analysis (n = 3880)                     | 0.89 | [0.84, 0.95] | <0.001 |       |
| Low age group                                |      |              |        |       |
| Discovery cohort (n = 863)                   | 0.84 | [0.72, 0.98] | 0.028  |       |
| Validation cohort (n = 3098)                 | 0.88 | [0.82, 0.95] | <0.001 |       |
| Meta-analysis (n = 3961)                     | 0.87 | [0.82, 0.93] | <0.001 |       |
| <i>Ruminococcaceae UCG-003-T2D</i>           |      |              |        | 0.834 |
| High age group                               |      |              |        |       |
| Discovery cohort (n = 856)                   | 0.92 | [0.77, 1.09] | 0.367  |       |
| Validation cohort (n = 3024)                 | 0.85 | [0.76, 0.96] | 0.007  |       |
| Meta-analysis (n = 3880)                     | 0.87 | [0.79, 0.96] | 0.006  |       |
| Low age group                                |      |              |        |       |
| Discovery cohort (n = 863)                   | 0.71 | [0.52, 0.94] | 0.026  |       |
| Validation cohort (n = 3098)                 | 0.95 | [0.80, 1.12] | 0.555  |       |
| Meta-analysis (n = 3961)                     | 0.85 | [0.64, 1.12] | 0.239  |       |
| <i>Ruminococcaceae UCG-003-MetS</i>          |      |              |        | 0.631 |
| High age group                               |      |              |        |       |
| Discovery cohort (n = 856)                   | 0.70 | [0.57, 0.84] | <0.001 |       |
| Validation cohort (n = 3024)                 | 0.88 | [0.81, 0.96] | 0.003  |       |
| Meta-analysis (n = 3880)                     | 0.80 | [0.64, 0.99] | 0.047  |       |

---

 Low age group

|                              |      |              |        |
|------------------------------|------|--------------|--------|
| Discovery cohort (n = 863)   | 0.86 | [0.70, 1.05] | 0.148  |
| Validation cohort (n = 3098) | 0.81 | [0.73, 0.90] | <0.001 |
| Meta-analysis (n = 3961)     | 0.82 | [0.75, 0.90] | <0.001 |

## Sex stratification

*Ruminococcaceae* UCG-002-Dyslipidaemia 0.003

## men

|                              |      |              |        |
|------------------------------|------|--------------|--------|
| Discovery cohort (n = 571)   | 0.82 | [0.68, 0.98] | 0.033  |
| Validation cohort (n = 2723) | 0.88 | [0.81, 0.95] | <0.001 |
| Meta-analysis (n = 3294)     | 0.87 | [0.81, 0.93] | <0.001 |

## women

|                              |      |              |       |
|------------------------------|------|--------------|-------|
| Discovery cohort (n = 1148)  | 0.80 | [0.68, 1.02] | 0.109 |
| Validation cohort (n = 3399) | 0.99 | [0.93, 1.07] | 0.892 |
| Meta-analysis (n = 4547)     | 0.96 | [0.88, 1.05] | 0.394 |

*Ruminococcaceae* UCG-002-T2D 0.158

## men

|                              |      |              |       |
|------------------------------|------|--------------|-------|
| Discovery cohort (n = 571)   | 0.90 | [0.71, 1.13] | 0.377 |
| Validation cohort (n = 2723) | 0.93 | [0.82, 1.06] | 0.287 |
| Meta-analysis (n = 3294)     | 0.92 | [0.82, 1.04] | 0.173 |

## women

|                              |      |              |        |
|------------------------------|------|--------------|--------|
| Discovery cohort (n = 1148)  | 0.70 | [0.57, 0.86] | <0.001 |
| Validation cohort (n = 3399) | 0.85 | [0.75, 0.97] | 0.014  |
| Meta-analysis (n = 4547)     | 0.79 | [0.66, 0.95] | 0.011  |

*Ruminococcaceae* UCG-002-MetS 0.082

## men

|                            |      |              |       |
|----------------------------|------|--------------|-------|
| Discovery cohort (n = 571) | 0.75 | [0.60, 0.93] | 0.009 |
|----------------------------|------|--------------|-------|

|                                              |      |              |        |       |
|----------------------------------------------|------|--------------|--------|-------|
| Validation cohort (n = 2723)                 | 0.84 | [0.76, 0.92] | <0.001 |       |
| Meta-analysis (n = 3294)                     | 0.82 | [0.76, 0.90] | <0.001 |       |
| women                                        |      |              |        |       |
| Discovery cohort (n = 1148)                  | 0.77 | [0.65, 0.90] | 0.002  |       |
| Validation cohort (n = 3399)                 | 0.77 | [0.65, 0.90] | 0.080  |       |
| Meta-analysis (n = 4547)                     | 0.85 | [0.71, 1.02] | 0.075  |       |
| <i>Ruminococcaceae</i> UCG-003-Dyslipidaemia |      |              |        | 0.120 |
| men                                          |      |              |        |       |
| Discovery cohort (n = 571)                   | 0.75 | [0.61, 0.91] | 0.004  |       |
| Validation cohort (n = 2723)                 | 0.85 | [0.79, 0.92] | <0.001 |       |
| Meta-analysis (n = 3294)                     | 0.82 | [0.74, 0.92] | <0.001 |       |
| women                                        |      |              |        |       |
| Discovery cohort (n = 1148)                  | 0.96 | [0.85, 1.08] | 0.464  |       |
| Validation cohort (n = 3399)                 | 0.92 | [0.84, 1.01] | 0.016  |       |
| Meta-analysis (n = 4547)                     | 0.93 | [0.87, 0.99] | 0.014  |       |
| <i>Ruminococcaceae</i> UCG-003-T2D           |      |              |        | 0.222 |
| men                                          |      |              |        |       |
| Discovery cohort (n = 571)                   | 0.96 | [0.75, 1.20] | 0.719  |       |
| Validation cohort (n = 2723)                 | 0.92 | [0.80, 1.05] | 0.202  |       |
| Meta-analysis (n = 3294)                     | 0.93 | [0.82, 1.04] | 0.199  |       |
| women                                        |      |              |        |       |
| Discovery cohort (n = 1148)                  | 0.80 | [0.65, 0.98] | 0.036  |       |
| Validation cohort (n = 3399)                 | 0.85 | [0.75, 0.97] | 0.019  |       |
| Meta-analysis (n = 4547)                     | 0.84 | [0.75, 0.94] | 0.002  |       |
| <i>Ruminococcaceae</i> UCG-003-MetS          |      |              |        | 0.367 |
| men                                          |      |              |        |       |
| Discovery cohort (n = 571)                   | 0.81 | [0.64, 1.00] | 0.064  |       |

---

|                              |      |              |        |
|------------------------------|------|--------------|--------|
| Validation cohort (n = 2723) | 0.80 | [0.73, 0.88] | <0.001 |
| Meta-analysis (n = 3294)     | 0.80 | [0.74, 0.88] | <0.001 |
| women                        |      |              |        |
| Discovery cohort (n = 1148)  | 0.76 | [0.63, 0.89] | <0.001 |
| Validation cohort (n = 3399) | 0.90 | [0.82, 0.99] | 0.030  |
| Meta-analysis (n = 4547)     | 0.84 | [0.71, 0.99] | 0.041  |

---

255 \*Multivariable logistic regression (Odds ratio) was used to estimate the association of  
256 *Ruminococcaceae UCG-002* and *Ruminococcaceae UCG-003* with cardiometabolic disease (CMD)  
257 risk. Median of age was used as the cutoff in the age stratification. All statistical tests were two-sided.  
258 T2D: type 2 diabetes; MetS: metabolic syndrome.

259 **Supplementary Table 7** Sensitivity analysis of the mediation effect of bile acids in  
 260 the association of chronic insomnia-related gut microbiota with CMD risk\*

| Sensitivity results               | Outcomes |
|-----------------------------------|----------|
| <i>Ruminococcaceae UCG-002</i>    |          |
|                                   | MetS     |
| For MCA: Rho at which ACME = 0    | 0.100    |
| For NorCA: Rho at which ACME = 0  | 0.130    |
|                                   | T2D      |
| For IsoLCA: Rho at which ACME = 0 | -0.120   |
| <i>Ruminococcaceae UCG-003</i>    |          |
|                                   | MetS     |
| For MCA: Rho at which ACME = 0    | 0.130    |
| For NorCA: Rho at which ACME = 0  | 0.145    |
|                                   | T2D      |
| For IsoLCA: Rho at which ACME = 0 | -0.145   |

261 \*The sensitivity analysis of mediation was performed using the R package “medsens” with default  
 262 parameters. The Rho from the R package “medsens” is interpreted as a Pearson correlation. For  
 263 example, a Rho of 0.10 is often regarded as a weak association, which implies that it would take some  
 264 set of unmeasured confounders of the mediator and outcome to induce a relatively weak correlation  
 265 between the mediator and the outcome for the observed mediated effect to equal zero. MCA: Muro  
 266 cholic acid; NorCA: nor cholic acid; IsoLCA: isolithocholic acid; CMD: cardiometabolic disease;  
 267 MetS: metabolic syndrome; T2D: type 2 diabetes; ACME: average causal mediated effect.

268 **Supplementary Table 8** The association of tea consumption with chronic insomnia\*

| Cohorts           | Odds ratio (OR) | 95%CI        | <i>p</i> value |
|-------------------|-----------------|--------------|----------------|
| Discovery cohort  | 0.85            | [0.60, 1.19] | 0.334          |
| Validation cohort | 0.64            | [0.49, 0.83] | <0.001         |
| Meta-analysis     | 0.72            | [0.55, 0.95] | 0.020          |

269 \*Multivariable logistic regression (Odds ratio) was used to estimate the association of tea consumption  
270 with chronic insomnia, adjusted for the potential covariates. The Benjamini-Hochberg method was  
271 used to control false discovery rate (FDR) for multiple testing. All statistical tests were two-sided.

272 **Supplementary Figures**273 **Supplementary Fig. 1** The association of chronic insomnia with Shannon index,

274 Chao 1 index, ACE index and Simpson index among four groups.

275

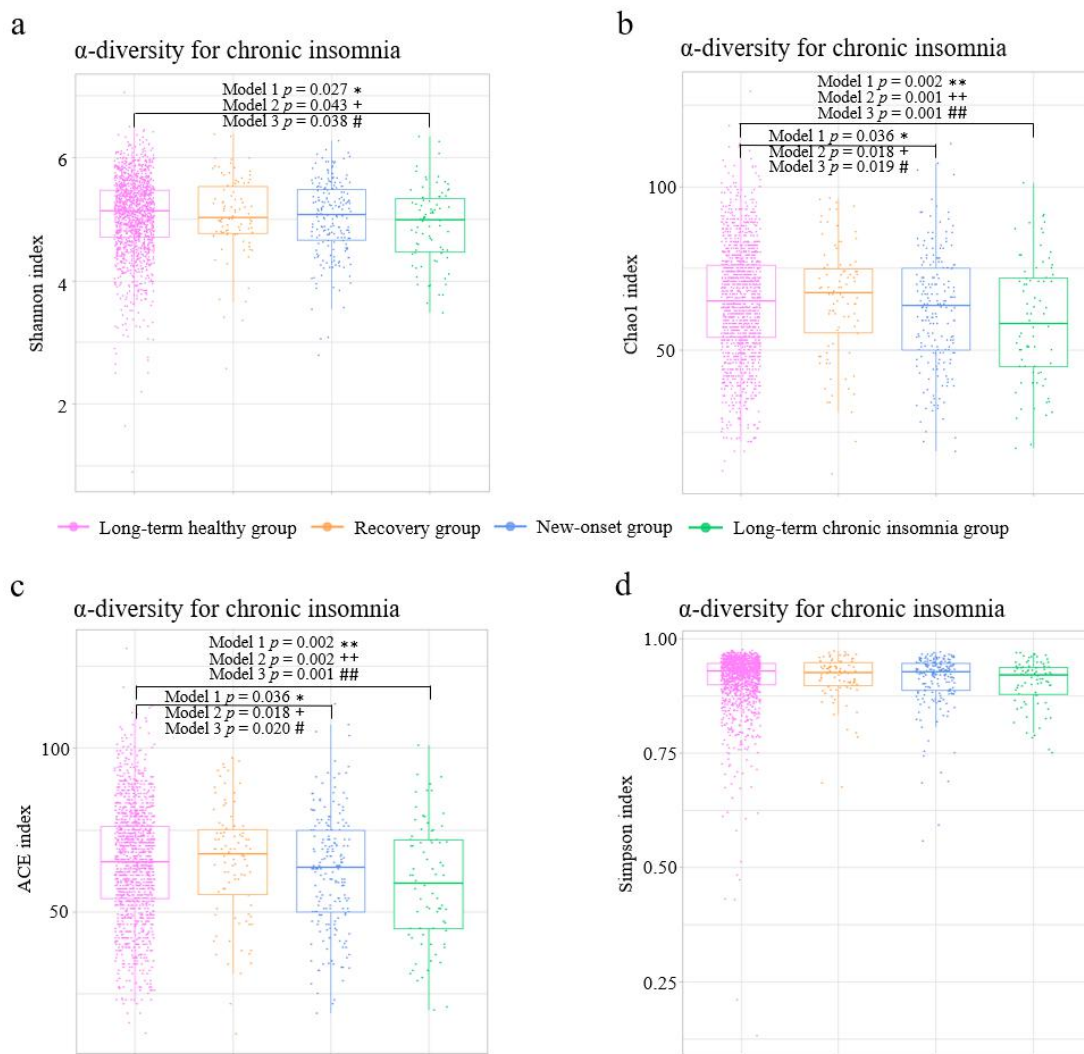

276

277 **Supplementary Fig. 2** The association of chronic insomnia with Shannon index,  
278 Chao 1 index, ACE index and Simpson index in the discovery cohort comparing  
279 Chronic insomnia group and Long-term healthy group.

280

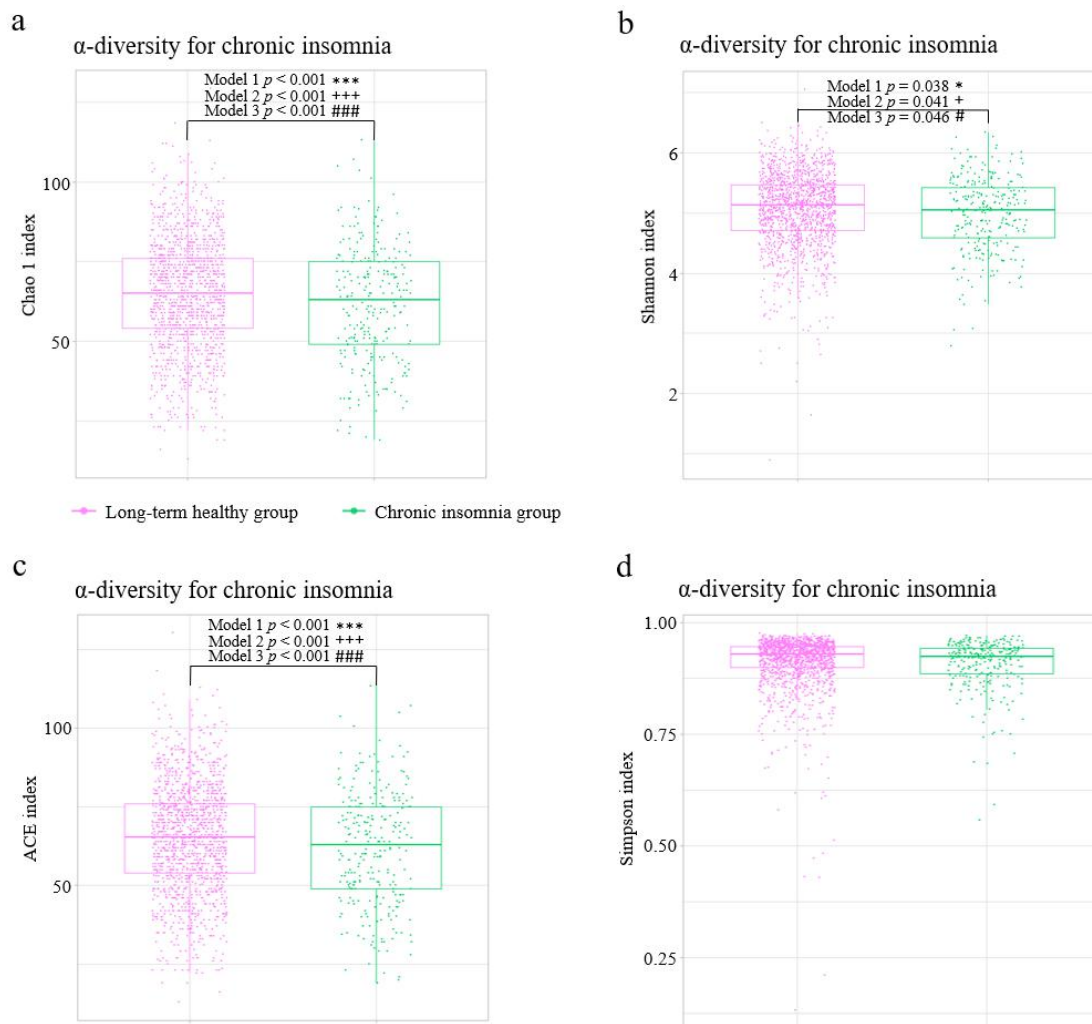

281



282 **Supplementary Fig. 3** The association of chronic insomnia with Shannon index,  
283 Chao 1 index, ACE index and Simpson index in the validation cohort comparing  
284 Chronic insomnia group and Non-chronic insomnia group.

285

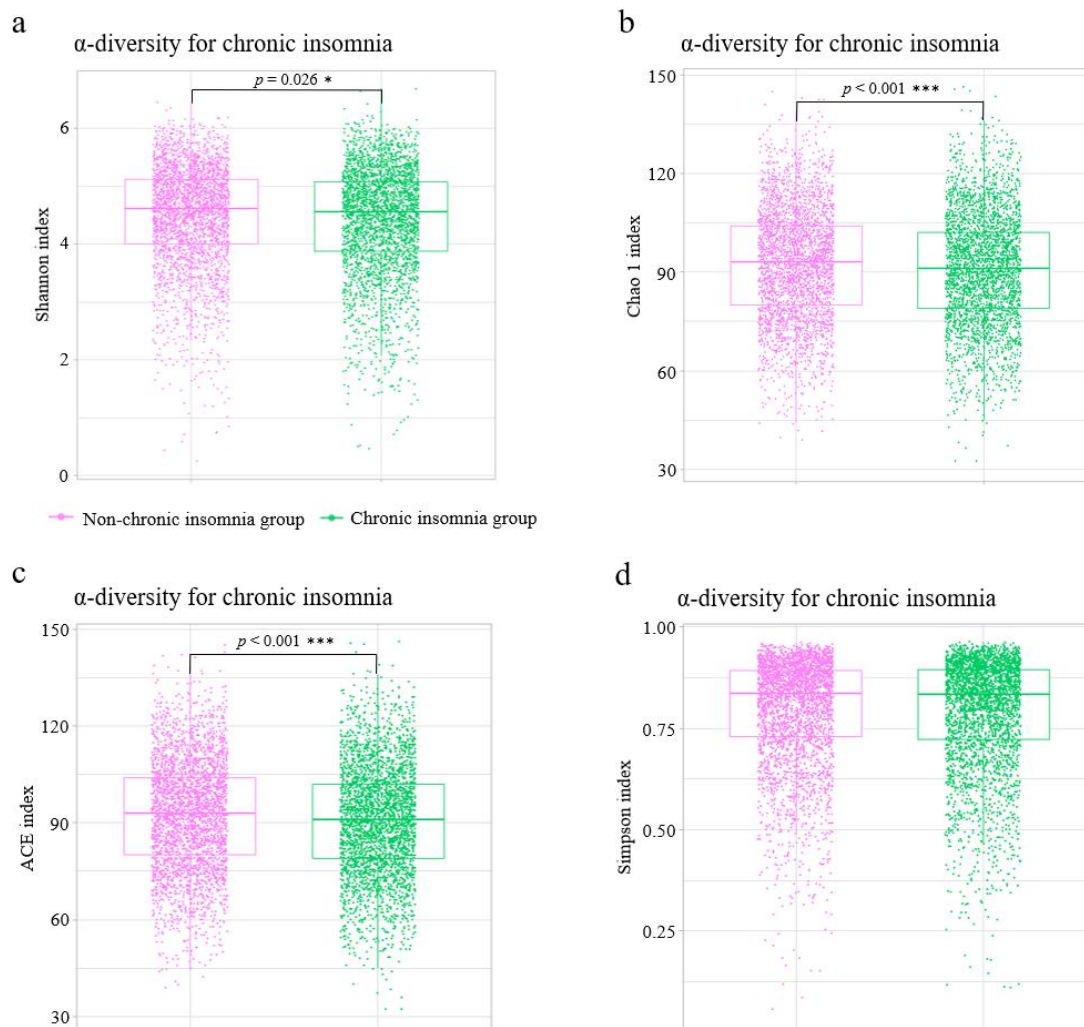

286

287 **Supplementary Fig. 4** Sensitivity analysis for the association between chronic  
 288 insomnia and gut microbial features in the Guangdong Gut Microbiome Project.  
 289

Sensitivity analysis for gut microbiota biomarkers of chronic insomnia in the GGMP

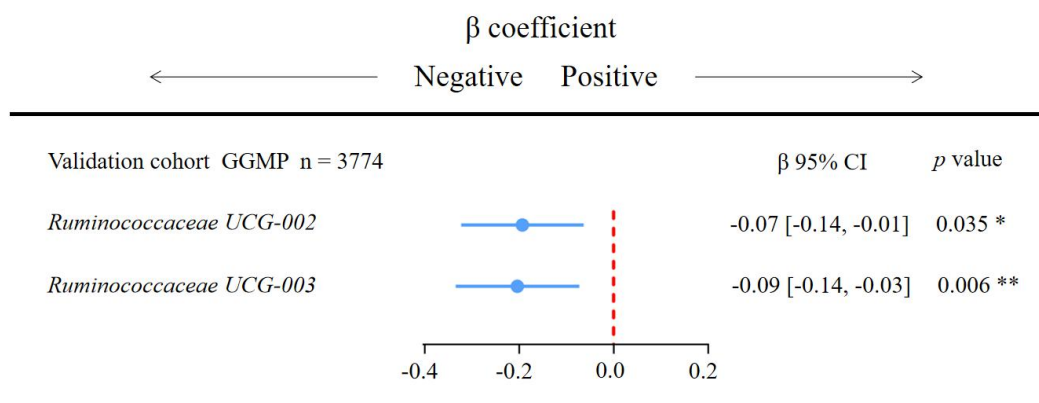

290

291 **Supplementary Fig. 5** The potential bile acid features of chronic insomnia.

292

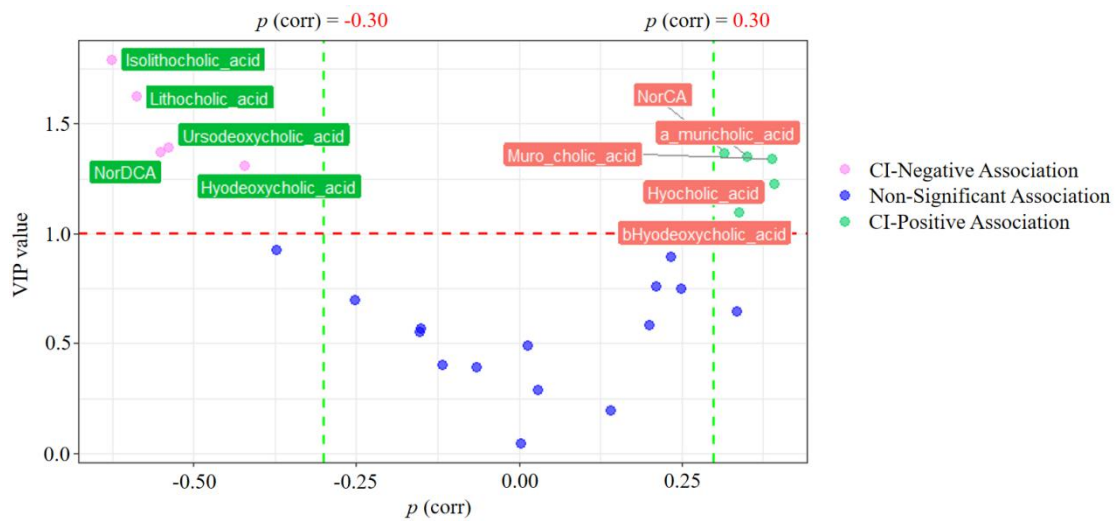

293

294 **Supplementary Fig. 6** Sensitivity analysis for the association between chronic  
 295 insomnia-related microbial features and cardiometabolic diseases in the Guangdong  
 296 Gut Microbiome Project.  
 297

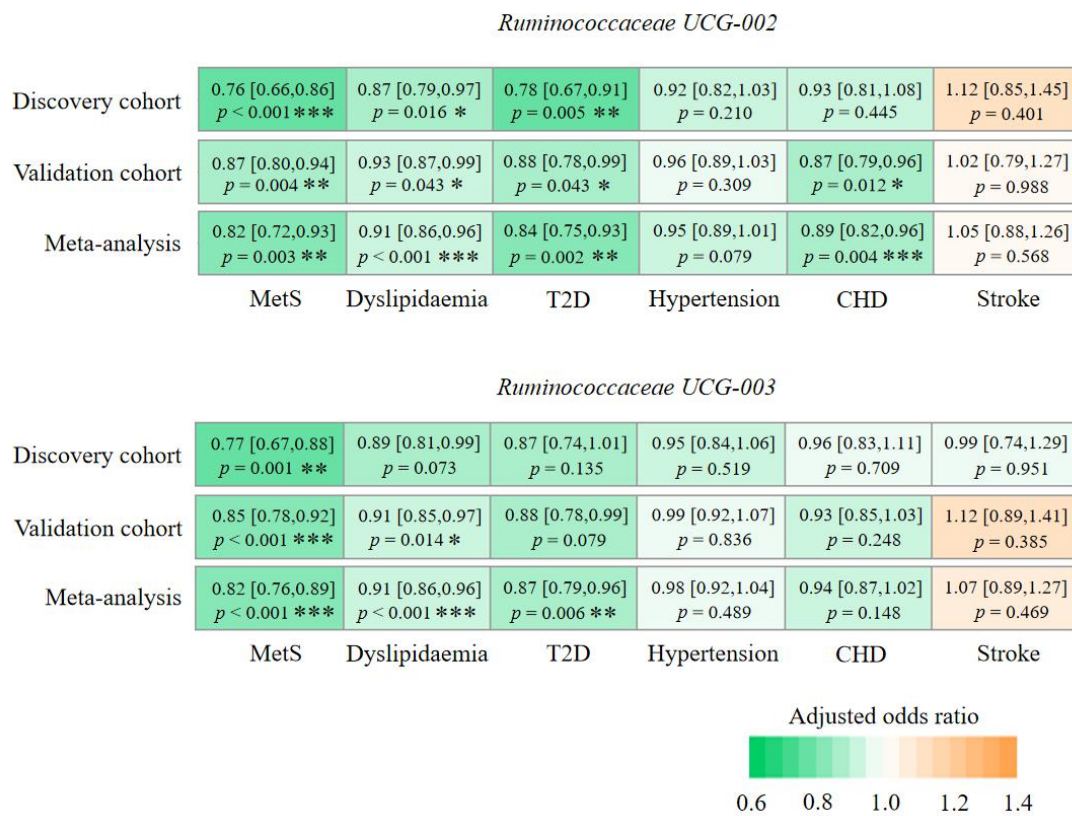

298

299 **Supplementary Fig. 7** Prospective association of dietary factors with the identified  
 300 microbial feature *Ruminococcaceae UCG-003* linking chronic insomnia and  
 301 cardiometabolic diseases.  
 302

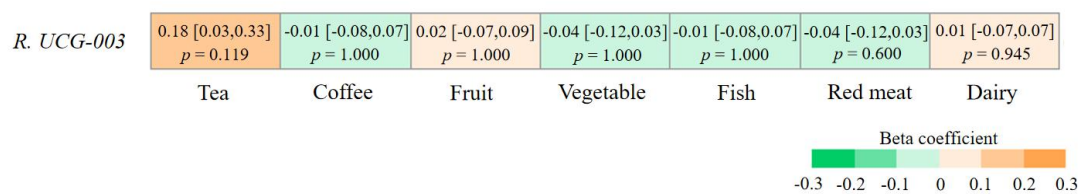

303

---

304 **Reference**

- 305 1. Bolyen E, *et al.* Reproducible, interactive, scalable and extensible microbiome data science  
306 using QIIME 2. *Nat Biotechnol* **37**, 852-857 (2019).
